1 Missing the vulnerable – Inequalities in social protection  
2 among the general population, people living with HIV,  
3 and adolescent girls and young women in 13 sub-  
4 Saharan African countries: Analysis of population-based  
5 surveys

6

7 Short title:

8 Missing the vulnerable – Inequalities in social protection

9

10 Author names:

11 David Chipanta<sup>1 \*</sup>, Silas Amo-Agyei<sup>2, #a, #b</sup>, Lucas Hertzog<sup>3</sup>, Ahmad Reza Hosseinpoor<sup>4</sup>,  
12 Michael Smith<sup>5, c</sup>, Caitlin Mahoney<sup>5, d</sup>, Juan Gonzalo Jaramillo Mejia<sup>5, d</sup>, Olivia Keiser<sup>6</sup>, Janne  
13 Estill<sup>6</sup>

14

15 Affiliation

16 <sup>1</sup> United Nations Joint Programme on HIV/AIDS (UNAIDS), Windhoek, Namibia.

17 <sup>2</sup> #aThe University of Manchester, Manchester, United Kingdom.

18 #bUnited Nations High Commissioner for Refugees, Geneva, Switzerland.

19 <sup>3</sup> WHO Collaborating Centre for Climate Change and Health Impact Assessment, Faculty of  
20 Health Sciences, School of Population Health, Curtin University, Perth, Australia.

21 <sup>4</sup> Department of Data and Analytics, World Health Organization, Geneva, Switzerland.

22 <sup>5</sup> Nutrition Division <sup>c</sup>, Social Protection Unit <sup>d</sup>, World Food Programme, Rome, Italy.

23 <sup>6</sup> Institute of Global Health, University of Geneva, Geneva, Switzerland.

24

25 Corresponding author

26 \*David Chipanta

27 Email: [chipantad@unaids.org](mailto:chipantad@unaids.org)

28

29 **Abstract**

30 Inequality in access to services is a global problem mainly impacting the poorest  
31 populations. The role of social protection in reducing inequalities is recognized, but few  
32 studies have investigated whether social protection benefits people facing considerable  
33 socioeconomic inequalities. We assessed inequalities in receiving social protection among  
34 the public, men and women living with human immunodeficiency virus (PLHIV), and  
35 adolescent girls and young women (AGYW), using population-based data from 13 African  
36 countries. We constructed concentration curves and computed concentration indices (CIX)  
37 for each country and population group. We also conducted a desk review of social protection  
38 in the studied countries where information was available on the characteristics of social  
39 protection programs and their access by the general population, PLHIV, and AGYW. The  
40 sample size ranged from 10,197 in Eswatini to 29,577 in Tanzania. Women comprised 60%  
41 or more of PLHIV in the surveyed countries. 50%–70% of the respondents were  
42 unemployed, except in Cameroon, Kenya, and Uganda, where less than 50% were  
43 unemployed. Generally, the proportion of respondents from wealth quintile one (Q1), the  
44 poorest 20% of households, was like that from Q2–Q5. The proportion of the general  
45 population receiving social protection varied from 5.2% (95% Confidence Interval 4.5%–  
46 6.0%) in Ethiopia to 39.9% (37.0%–42.8%) in Eswatini. Among PLHIV, the proportion  
47 receiving social protection varied from 6.9% (5.7%–8.4%) among men living with HIV in  
48 Zambia to 45.0% (41.2–49.0) among women living with HIV in Namibia. Among AGYW, the  
49 proportion varied from 4.4% (3.6–5.3) in Ethiopia to 44.6% (40.8–48.5) in Eswatini. In  
50 general, 15% or less of the respondents from Q1 reported receiving social protection in eight  
51 countries (i.e., Cameroon, Côte d'Ivoire, Ethiopia, Kenya, Malawi, Tanzania, Uganda, and  
52 Zambia), with 10% or less in three countries (Cameroon, Côte d'Ivoire, and Ethiopia); 15%–  
53 20% in Rwanda, 30% in Zimbabwe, 40% in Lesotho, and more than 50% in Eswatini and  
54 Namibia. Among the wealthiest quintiles (Q5), the proportion receiving social protection  
55 ranged from 3.6% (2.6%–5.0%) in Ethiopia to 19.7% (16.25–23.8%) in Namibia. Only in  
56 countries with higher social protection coverage did the proportion of the poorest wealth  
57 quintile households reached also high. Socioeconomic inequalities in receiving social  
58 protection favored the poor in 11 out of 13 countries and the rich in Cameroon and were  
59 undefined in Côte d'Ivoire. The CIX values for socioeconomic inequalities in receiving social  
60 protection in these 11 countries ranged from –0.080 ( $p=0.002$ ) among the general  
61 population in Malawi to –0.372 ( $p<0.001$ ) among WLHIV in Zimbabwe. However, in 8  
62 countries (Cameroon, Côte d'Ivoire, Ethiopia, Kenya, Malawi, Tanzania, Uganda, and  
63 Zambia) of these 11 countries, 15% or less of the population from the poorest wealth quintile  
64 received social protection. In the countries surveyed, access to social protection for the  
65 general population, MLHIV and WLHIV, and AGYW was generally low but favored people  
66 from poor households. However, pro-poor social protection, although necessary, is not  
67 sufficient to ensure that people from the poorest households receive social protection.  
68 Further research is required to identify and reach people from the poorest households with  
69 social protection in sub-Saharan Africa.

70

71

72

73

## 74 **1 Introduction**

75 Inequality in access to services is an urgent global concern, with the alarming gap between extreme  
76 wealth and poverty reaching unprecedented levels and thrusting billions of people into hardship,  
77 including hunger [1, 2]. Inequality is multifaceted, spanning race, ethnicity, income, wealth, and  
78 gender. Gender inequalities are deeply entrenched and intersect with other forms of inequality [3, 4].  
79 Generally, equitable communities enjoy robust social cohesion, low crime rates, high levels of trust,  
80 life satisfaction, durable peace, political stability, and economic growth, in contrast to their inequitable  
81 counterparts [3, 5, 6, 7]. Conversely, high inequalities can undermine a nation's capacity to prevent,  
82 respond, and adapt to emergencies, including infectious diseases [3, 7]. Therefore, addressing  
83 inequalities is an imperative objective of the Sustainable Development Goals (SDGs). SDG 10—  
84 Reducing Inequalities—committed member states to reducing inequalities by promoting the inclusion  
85 of all population groups in socioeconomic and political spheres by 2030 [8]. Despite the increasing  
86 global focus on inequalities, current trajectories show that the world is unlikely to meet even 10% of  
87 the full targets under SDG 10 by 2030 [9]. People residing in the Global South, particularly in sub-  
88 Saharan Africa, bear the impact of the failure to achieve SDG10 [9].

89 Social protection programs can accelerate progress toward achieving SDG 10. Social protection is  
90 defined as policies and programs that help individuals and societies manage risk and uncertainty,  
91 protect them from poverty and inequality, and allow them to access economic opportunity [10]. They  
92 reduce poverty, inequality, and the prevalence of ill health; foster gender equality; and stimulate  
93 economic growth [11, 12, 13, 14]. Social protection programs that cater to the poorest populations can  
94 alleviate inequality [15]. Such programs are pro-poor. They prioritize the most impoverished and  
95 vulnerable people, including children, women, persons with disabilities, and the elderly [11, 16, 17,  
96 18]. However, research investigating socioeconomic inequalities in receiving social protection in sub-  
97 Saharan Africa is limited. We assessed socioeconomic inequalities in receiving social protection  
98 among the general population, people (women and men) living with HIV (PLHIV), and adolescent girls  
99 and young women (AGYW) using population-based impact assessment survey data from 13 sub-  
100 Saharan African countries. Our hypothesis was that social protection was pro-poor, focused on  
101 people from poor households who are considered most vulnerable and deserving of access to it.

## 102 **2 Materials and Methods**

103 We analyzed SDG Indicator 1.3.1, defined as the proportion of the population receiving at least one  
104 social protection benefit from any source, as the main outcome indicator. UNAIDS earmarked this  
105 indicator as a target to measure the coverage of social protection for people living with, at risk of, or  
106 affected by HIV [19]. The target states ensure that by 2025, 45% of people living with, at risk of or  
107 affected by HIV have access to social protection benefits [19]. We examined inequalities in receiving  
108 social protection within the preceding 12 months of the survey interview by the general population,  
109 men and women living with HIV (MLHIV and WLHIV), and AGYW. We also assessed whether social  
110 protection programs in the participating countries reached the poorest households measured based  
111 on living standards including household assets.

112 We analyzed the PHIA survey data for countries with data on social protection receipt by the general  
113 population, MLHIV and WLHIV, and AGYW. The PHIA surveys collected a range of health and  
114 sociodemographic data to evaluate the impact of HIV programs in the countries supported by the  
115 United States President's Emergency Plan for AIDS Relief. We used the Household, Adult Interview,  
116 and Adult HIV Biomarker datasets. In participating households, a household questionnaire was  
117 administered to the household head, who indicated all individuals living in the household and provided  
118 information on the household, such as assets, living standards, and access to social protection  
119 benefits. Individual questionnaires were then administered to eligible and consenting adults aged 15  
120 or older in the household. The Adult HIV Biomarker data set contained the HIV test results of all  
121 adults and adolescents aged 15 or older who completed an individual interview and consented or  
122 agreed to provide blood samples for HIV testing. The interviews assessed wealth, education level,  
123 and other sociodemographic characteristics at the individual and household levels. They also included  
124 questions about external economic support. In addition, the questions identified AGYWs aged 15–24  
125 years. We obtained the PHIA data sets from the PHIA Project website at [https://phia-](https://phia-data.icap.columbia.edu/)  
126 [data.icap.columbia.edu/](https://phia-data.icap.columbia.edu/). We also conducted a desk review of social protection in the studied  
127 countries where information was available on the characteristics of social programs and their access  
128 by the general population, PLHIV, and AGYW.

### 129 **2.1 Variables and outcome descriptions**

130

131 Our primary outcome was the receipt of any form of external economic support. This support was  
132 defined as any external economic assistance provided to the household within the previous 12  
133 months of the survey. This was derived from the PHIA household survey question “Has your  
134 household received any of the following forms of economic support in the last 12 months?” The  
135 acknowledgment of any economic support, including assistance for school fees, material support for  
136 education, food assistance, support for income generation, social pensions, and cash transfers,  
137 including pensions, disability, and child grants, was recorded as receiving social protection benefits.  
138 We classified a respondent as HIV-positive if the respondent self-reported an HIV-positive test result  
139 and the result of their HIV biomarker test was positive. AGYW were defined as females aged 15–24  
140 years, men as males 15 years and older and women as females 15 years and older. Other  
141 explanatory variables included HIV prevalence, age, sex, marital status, household size, residence,  
142 employment, education, wealth, and region defined in Supplementary Table 1.

143 The study sample included women and men aged 15–59 years who were interviewed. Any individual  
144 with a missing sex was excluded from the analysis. Household wealth was evaluated via a composite  
145 measure reflecting living standards, based on asset ownership, which included items such as  
146 television sets, refrigerators, water access, and roofing. Region reflected the subregion of a country  
147 and was included in the analyses to account for subregional variation in access to social protection.

## 148 **2.2 Analysis**

### 149 ***2.2.1 Measuring the level of social protection coverage***

150 We used the *surveymeans* procedure to determine the weighted proportion of persons who reported  
151 receiving any social protection benefit for each country and population group – the public aged 15 to  
152 59, MLHIV, WLHIV and AGYW. Survey weights accounting for nonresponse using Chi-squared  
153 automatic interaction detector analysis, noncoverage, and the probability of selection were applied.  
154 We used individual interview weights in the analysis of the data. Variances and 95% confidence  
155 intervals (CIs) were estimated using the corresponding jackknife replicate weights [20] .

### 156 ***2.2.2 Measuring inequality in social protection coverage***

157 We used two methodologies to examine income-related inequality in receiving social protection. First,  
158 we constructed concentration curves for receiving social protection for each subpopulation within  
159 each country. A concentration curve represents the cumulative percentage of a variable of interest

160 (social protection coverage in the context of this study) plotted on the y-axis against the cumulative  
161 proportion of the population—ranked by socioeconomic status from the poorest to the richest—on the  
162 x-axis [21]. The concentration curve coincides with the 45° line, known as the line of equality, when  
163 every individual receives the same value of the variable of interest. A concentration curve lying above  
164 (below) the line of equality signifies that the variable of interest is concentrated among the poor (rich).  
165 The degree of pro-poor (pro-rich) inequality increases as the curve diverges further above (below) the  
166 line of equality. In this study, we defined pro-poor social protection by the concentration curve of  
167 receiving social protection above the line of equality.

168 In the second approach, we computed the Concentration Index (CIX). The CIX encapsulates the  
169 information conveyed by the concentration curve, quantifying the socioeconomic inequalities  
170 associated with the variable of interest. The CIX is twice the area between the concentration curve  
171 and the line of equality, equating to zero in the absence of economic-related inequality [21]. A  
172 negative (positive) CIX value signifies that the curve lies above (below) the line of equality, indicating  
173 a disproportionate concentration of the variable of interest among the poor (rich). A zero CIX value  
174 can also occur if the curve intersects the line of equality and the areas above and below the equality  
175 line offset each other. In standard practice, CIX is interpreted in conjunction with the concentration  
176 curve. We conducted all analyses using Stata version 18.

### 177 **2.2.3 Ethics Statement**

178 PHIA survey administration follows international scientific research standards in human subjects,  
179 including protecting respondents' privacy and confidentiality of information. Each country's PHIA  
180 survey report provides details of the survey design, sampling procedure, protection of the privacy and  
181 confidentiality of information, and obtaining informed consent.

182 Ethics and regulatory bodies, including ministries of health and institutional review boards, approved  
183 the PHIA survey protocols, consent forms, questionnaires, and other survey documents in each  
184 country. The institutional review boards of Columbia University Medical Center, Westat, and the  
185 Centers for Disease Control also reviewed and approved the survey documents.

186 This study did not require ethical clearance because the data were de-identified. It can be accessed  
187 by registering at the PHIA Project website at <https://phia-data.icap.columbia.edu/>

### 188 **3. Results**

189 The 13 countries and the years of the surveys were Cameroon (2017–2018), Côte d'Ivoire (2017–  
190 2018), Ethiopia (2017–2018), Eswatini (2016–2017), Kenya (2018–2019), Lesotho (2016–2017),  
191 Malawi (2015–2016), Namibia (2017), Rwanda (2018), Tanzania (2016–2017), Uganda (2016–2017),  
192 Zambia (2016), and Zimbabwe (2015–2016). The sample size ranged from 10,197 in Eswatini to  
193 29,577 in Tanzania, with median ages ranging between 27 years (interquartile range, IQR, 20–37 in  
194 Uganda) to 32 years (IQR 25–41 in Kenya) (Table 1). HIV prevalence was lowest in Côte d'Ivoire  
195 (2.7%, 95% CI (2.4%–3.1%)) and highest in Eswatini (27.9%, 26.5%–29.3%). Women comprised 60%  
196 or more of people living with HIV in the surveyed countries (Supplementary Table 2).

197 More than 60% of the respondents lived in rural areas in eight countries (i.e., Eswatini, Kenya,  
198 Lesotho, Malawi, Rwanda, Tanzania, Uganda, and Zimbabwe). In all countries surveyed, 80% or  
199 more of respondents were married or cohabiting, and 60% or more had at least four members. Of the  
200 respondents, 50%–70% were unemployed, except in Cameroon, Kenya, and Uganda, where less  
201 than 50% were unemployed. Up to 13% of the respondents had no formal education, except in Côte  
202 d'Ivoire, where 42% had no formal education. In general, the proportion of respondents from wealth  
203 quintile one (Q1), that is, the bottom 20% of households, was similar to those from Q2–Q5 (Table 1).

**Table 1: Survey weighted sample descriptive statistics by country (PHIA 2015-2019). The results are reported as (percentages with, sample size, 95% confidence intervals and absolute numbers unless otherwise indicated)**

|                    | Cameroon<br>(N=26039)    | Côte d'Ivoire<br>(N=18339) | Eswatini (N=10197)      | Ethiopia (N=18466)       | Kenya (N=23536)          | Lesotho (N=12842)        | Malawi (N=19092)         |
|--------------------|--------------------------|----------------------------|-------------------------|--------------------------|--------------------------|--------------------------|--------------------------|
| Sex                |                          |                            |                         |                          |                          |                          |                          |
| Male               | 49.1 (49.0 - 49.2) 11827 | 51.3 (51.2 - 51.4) 9145    | 45.5 (45.5 - 45.6) 4377 | 50.0 (49.9 - 50.1) 7735  | 47.5 (47.1 - 47.9) 9468  | 50.1 (50.0 - 50.1) 5339  | 48.5 (48.5 - 48.5) 8002  |
| Female             | 50.9 (50.8 - 51.0) 14212 | 48.7 (48.6 - 48.8) 9194    | 54.5 (54.4 - 54.5) 5820 | 50.0 (49.9 - 50.1) 11731 | 52.5 (52.1 - 52.9) 14068 | 49.9 (49.9 - 50.0) 7503  | 51.5 (51.5 - 51.5) 11090 |
| Age [Years] (IQR)  | 29 (21 - 39)             | 29 (22 - 39)               | 28 (21 - 38)            | 28 (21 - 38)             | 32 (25 - 41)             | 30 (22 - 40)             | 28 (20 - 38)             |
| 15-24              | 36.6 (36.6 - 36.7) 9333  | 34.3 (34.2 - 34.4) 6199    | 37.2 (37.2 - 37.3) 3785 | 35.7 (35.6 - 35.8) 7882  | 21.9 (21.4 - 22.5) 4513  | 34.1 (34.0 - 34.2) 4403  | 39.8 (39.8 - 39.9) 7166  |
| 25-34              | 28.1 (28.0 - 28.2) 7474  | 31.2 (31.2 - 31.3) 5387    | 29.0 (29.0 - 29.1) 2843 | 31.3 (31.2 - 31.3) 5982  | 35.0 (34.7 - 35.2) 7857  | 29.9 (29.8 - 29.9) 3640  | 27.6 (27.6 - 27.6) 5489  |
| 35-44              | 19.4 (19.4 - 19.5) 4928  | 19.2 (19.2 - 19.3) 3818    | 18.7 (18.6 - 18.7) 1820 | 19.4 (19.3 - 19.4) 3288  | 23.8 (23.5 - 24.0) 5770  | 19.0 (18.9 - 19.0) 2387  | 18.2 (18.2 - 18.2) 3690  |
| 45-54              | 11.8 (11.7 - 11.8) 3084  | 11.6 (11.6 - 11.6) 2221    | 11.3 (11.3 - 11.3) 1256 | 10.4 (10.3 - 10.4) 1730  | 14.5 (14.4 - 14.7) 3911  | 12.1 (12.0 - 12.1) 1593  | 10.8 (10.8 - 10.8) 2050  |
| 55+                | 4.0 (4.0 - 4.1) 1220     | 3.6 (3.6 - 3.6) 714        | 3.8 (3.8 - 3.9) 493     | 3.3 (3.3 - 3.4) 584      | 4.8 (4.8 - 4.9) 1485     | 5.0 (4.9 - 5.0) 819      | 3.6 (3.6 - 3.6) 697      |
| Residence type     |                          |                            |                         |                          |                          |                          |                          |
| Rural              | 47.4 (43.4 - 51.4) 14731 | 37.4 (33.8 - 41.2) 8762    | 72.0 (69.7 - 74.2) 7835 |                          | 60.5 (58.5 - 62.5) 14548 | 58.8 (56.4 - 61.2) 7774  | 79.9 (77.0 - 82.5) 11827 |
| Urban              | 52.6 (48.6 - 56.6) 11308 | 62.6 (58.8 - 66.2) 9577    | 28.0 (25.8 - 30.3) 2362 | 100.0(89.9 -100.1)18466  | 39.5 (37.5 - 41.5) 8988  | 41.2 (38.8 - 43.6) 5068  | 20.1 (17.5 - 23.0) 7265  |
| Marital status     |                          |                            |                         |                          |                          |                          |                          |
| Single             | 17.1 (16.4 - 17.7) 4402  | 8.8 (8.0 - 9.6) 1482       | 12.2 (11.5 - 13.0) 1290 | 14.8 (14.1 - 15.5) 3124  | 14.7 (14.0 - 15.3) 3670  | 17.0 (16.3 - 17.7) 2371  | 12.0 (11.3 - 12.7) 2441  |
| Married            | 82.9 (82.3 - 83.6) 21637 | 91.2 (90.4 - 92.0) 16857   | 87.8 (87.0 - 88.5) 8907 | 85.2 (84.5 - 85.9) 16342 | 85.3 (84.7 - 86.0) 19866 | 83.0 (82.3 - 83.7) 10471 | 88.0 (87.3 - 88.7) 16651 |
| Household size (n) |                          |                            |                         |                          |                          |                          |                          |
| 1 to 3             | 23.2 (21.9 - 24.6) 5823  | 25.7 (24.2 - 27.2) 4752    | 31.2 (29.2 - 33.3) 3146 | 39.5 (38.0 - 41.1) 8075  | 32.0 (30.5 - 33.5) 6774  | 40.5 (39.1 - 42.0) 5259  | 25.2 (23.9 - 26.5) 5075  |
| 4 to 6             | 35.8 (34.4 - 37.3) 9022  | 34.8 (32.6 - 37.0) 6308    | 37.4 (35.7 - 39.1) 3795 | 45.0 (43.7 - 46.3) 8361  | 44.8 (43.5 - 46.0) 10649 | 43.3 (41.8 - 44.8) 5543  | 50.8 (49.3 - 52.2) 9597  |
| >7                 | 40.9 (38.9 - 43.1) 11194 | 39.6 (37.0 - 42.2) 7279    | 31.4 (29.2 - 33.7) 3256 | 15.5 (14.0 - 17.0) 3030  | 23.2 (22.0 - 24.6) 6113  | 16.1 (14.8 - 17.6) 2040  | 24.0 (22.6 - 25.5) 4420  |
| Employment status  |                          |                            |                         |                          |                          |                          |                          |
| Not employed       | 45.1 (43.8 - 46.5) 12218 | 52.7 (51.1 - 54.3) 9962    | 56.7 (55.2 - 58.2) 5975 | 52.2 (50.8 - 53.7) 10996 | 42.4 (41.1 - 43.8) 11382 | 60.9 (59.6 - 62.1) 8156  | 70.4 (69.3 - 71.5) 13156 |
| Employed           | 54.9 (53.5 - 56.2) 13821 | 47.3 (45.7 - 48.9) 8377    | 43.3 (41.8 - 44.8) 4222 | 47.8 (46.3 - 49.2) 8470  | 57.6 (56.2 - 58.9) 12154 | 39.1 (37.9 - 40.4) 4686  | 29.6 (28.5 - 30.7) 5936  |
| Education level    |                          |                            |                         |                          |                          |                          |                          |
| Not educated       | 13.0 (11.9 - 14.3) 4695  | 40.8 (38.5 - 43.1) 7984    | 3.5 (3.0 - 4.0) 384     | 11.3 (10.3 - 12.4) 2318  | 7.5 (6.7 - 8.3) 2650     | 5.0 (4.5 - 5.5) 620      | 8.6 (8.0 - 9.3) 1521     |
| Primary            | 26.2 (24.9 - 27.5) 7358  | 25.6 (24.3 - 26.9) 4904    | 25.9 (24.7 - 27.3) 2795 | 35.1 (33.7 - 36.6) 6821  | 49.5 (48.2 - 50.8) 12002 | 39.8 (38.2 - 41.4) 5247  | 63.2 (61.7 - 64.7) 10894 |
| Secondary          | 33.5 (32.5 - 34.6) 8146  | 26.9 (25.4 - 28.5) 4539    | 59.9 (58.4 - 61.3) 6032 | 29.1 (28.0 - 30.2) 5706  | 30.9 (29.7 - 32.1) 6341  | 44.6 (43.2 - 46) 5719    | 25.3 (23.9 - 26.7) 5689  |
| Higher             | 27.3 (25.4 - 29.3) 5840  | 6.7 (5.5 - 8.2) 912        | 10.7 (9.4 - 12.2) 986   | 24.5 (22.7 - 26.3) 4621  | 12.1 (11.2 - 13.1) 2543  | 10.6 (9.6 - 11.7) 1256   | 2.9 (2.6 - 3.3) 988      |
| Wealth quintiles:  |                          |                            |                         |                          |                          |                          |                          |
| Q1: Poorest        | 19.9 (17.7 - 22.4) 7529  | 25.4 (22.0 - 29.1) 2867    | 20.2 (18.5 - 22.1) 2224 | 16.5 (14.4 - 18.9) 3379  | 19.9 (18.4 - 21.5) 6151  | 17.3 (15.5 - 19.3) 2485  | 15.2 (14.0 - 16.5) 2228  |
| Q2                 | 20.1 (17.8 - 22.7) 5776  | 19.1 (16.5 - 22.0) 3304    | 19.9 (18.2 - 21.7) 2139 | 17.6 (16.3 - 19.0) 3495  | 20.5 (19.3 - 21.8) 4937  | 18.9 (17.6 - 20.4) 2530  | 18.2 (16.9 - 19.5) 2725  |
| Q3                 | 21.3 (19.6 - 23.0) 4864  | 18.4 (16.4 - 20.6) 4169    | 22.9 (20.8 - 25.1) 2374 | 19.8 (18.4 - 21.3) 3895  | 20.7 (19.5 - 21.8) 4867  | 20.1 (18.6 - 21.7) 2539  | 20.1 (18.9 - 21.4) 3040  |
| Q4                 | 18.9 (17.2 - 20.7) 4065  | 19.7 (17.8 - 21.7) 4508    | 18.0 (16.1 - 20.1) 1697 | 22.1 (20.2 - 24.0) 4212  | 20.2 (18.6 - 21.9) 4441  | 21.0 (19.6 - 22.5) 2592  | 22.1 (20.7 - 23.7) 3902  |
| Q5: Wealthiest     | 19.8 (17.2 - 22.6) 3805  | 17.3 (14.5 - 20.6) 3491    | 19.0 (16.2 - 22.2) 1763 | 24.1 (21.8 - 26.5) 4485  | 18.8 (17.1 - 20.6) 3140  | 22.6 (20.7 - 24.8) 2696  | 24.4 (22.3 - 26.5) 7197  |

Q1 Quintiles 1: Poorest, Q5: Wealthiest. IQR Interquartile range \_\_\_\_ data set had no variable. Lesotho, we combined the population living in peri-urban areas with rural areas. Ethiopia data set only had an urban variable.



**Table 1: Survey weighted sample descriptive statistics by country (PHIA 2015-2019). The results are reported as percentages with 95% confidence intervals and absolute numbers unless otherwise indicated).**

|                    | <b>Namibia (N=18009)</b> | <b>Rwanda (N=29510)</b>  | <b>Tanzania (N=29577)</b> | <b>Uganda (N=28212)</b>  | <b>Zambia (N=21138)</b>  | <b>Zimbabwe (N=21424)</b> |
|--------------------|--------------------------|--------------------------|---------------------------|--------------------------|--------------------------|---------------------------|
| Sex                |                          |                          |                           |                          |                          |                           |
| Male               | 48.3 (48.2 - 48.3) 7967  | 48.1 (48.1 - 48.1) 13299 | 49.1 (49.1 - 49.1) 12867  | 47.4 (47.3 - 47.4) 12004 | 48.9 (48.9 - 49.0) 9104  | 47.7 (47.6 - 47.7) 8831   |
| Female             | 51.7 (51.7 - 51.8) 10042 | 51.9 (51.9 - 51.9) 16211 | 50.9 (50.9 - 50.9) 16710  | 52.6 (52.6 - 52.7) 16208 | 51.1 (51.0 - 51.1) 12034 | 52.3 (52.3 - 52.4) 12593  |
| Age [Years] (IQR)  | 29 (21 - 40)             | 29 (21 - 39)             | 28 (20 - 39)              | 27 (20 - 37)             | 27 (20 - 38)             | 29 (21 - 38)              |
| 15-24              | 35.2 (35.1 - 35.2) 6081  | 35.7 (35.7 - 35.7) 11365 | 38.4 (38.4 - 38.5) 10704  | 43.4 (43.3 - 43.4) 11321 | 41.1 (41.0 - 41.2) 8043  | 37.8 (37.8 - 37.8) 7730   |
| 25-34              | 28.7 (28.6 - 28.7) 4871  | 28.9 (28.8 - 28.9) 8181  | 27.3 (27.3 - 27.4) 8127   | 26.8 (26.8 - 26.9) 7643  | 27.3 (27.2 - 27.3) 5736  | 28.4 (28.4 - 28.4) 5570   |
| 35-44              | 19.4 (19.3 - 19.4) 3657  | 19.5 (19.5 - 19.5) 5636  | 18.8 (18.8 - 18.8) 5875   | 16.5 (16.4 - 16.5) 4923  | 18.1 (18.1 - 18.2) 4146  | 19.6 (19.6 - 19.6) 4360   |
| 45-54              | 12.5 (12.5 - 12.6) 2450  | 11.1 (11.1 - 11.1) 3086  | 11.5 (11.5 - 11.5) 3671   | 10.1 (10.1 - 10.1) 3315  | 10.1 (10.1 - 10.2) 2418  | 10.1 (10.1 - 10.1) 2596   |
| 55+                | 4.3 (4.3 - 4.3) 950      | 4.8 (4.8 - 4.8) 1242     | 3.9 (3.9 - 4.0) 1200      | 3.3 (3.2 - 3.3) 1010     | 3.4 (3.3 - 3.4) 795      | 4.1 (4.1 - 4.2) 1168      |
| Residence          |                          |                          |                           |                          |                          |                           |
| Rural              | 41.7 (39.4 - 44.0) 10146 | 79.3 (75.2 - 82.9) 21969 | 62.5 (58.7 - 66.2) 19601  | 71.3 (67.3 - 74.9) 20515 | 54.3 (50.8 - 57.6) 11911 | 64.0 (62.3 - 65.6) 14924  |
| Urban              | 58.3 (56.0 - 60.6) 7863  | 20.7 (17.1 - 24.8) 7541  | 37.5 (33.8 - 41.3) 9976   | 28.7 (25.1 - 32.7) 7697  | 45.7 (42.4 - 49.2) 9227  | 36.0 (34.4 - 37.7) 6500   |
| Marital status     |                          |                          |                           |                          |                          |                           |
| Single             | 18.7 (17.8 - 19.6) 3467  | 11.0 (10.6 - 11.5) 3250  | 13.4 (12.8 - 14.0) 4085   | 16.9 (16.3 - 17.5) 4866  | 11.4 (10.9 - 11.9) 2612  | 13.0 (12.4 - 13.6) 3111   |
| Married            | 81.3 (80.4 - 82.2) 14542 | 89.0 (88.5 - 89.4) 26260 | 86.6 (86.0 - 87.2) 25492  | 83.1 (82.5 - 83.7) 23346 | 88.6 (88.1 - 89.1) 18526 | 87.0 (86.4 - 87.6) 18313  |
| Household size (n) |                          |                          |                           |                          |                          |                           |
| 1 to 3             | 30.9 (29.5 - 32.4) 5294  | 15.2 (14.3 - 16.2) 4595  | 24.0 (22.7 - 25.4) 6749   | 19.5 (18.6 - 20.5) 5018  | 18.1 (17.1 - 19.2) 3836  | 27.8 (26.6 - 29.1) 6035   |
| 4 to 6             | 33.7 (32.1 - 35.4) 5783  | 44.3 (42.8 - 45.8) 12971 | 41.1 (39.8 - 42.4) 11799  | 35.7 (34.5 - 37.0) 9730  | 42.9 (41.8 - 44.1) 9176  | 49.4 (48.0 - 50.8) 10403  |
| >7                 | 35.4 (33.5 - 37.2) 6932  | 40.5 (38.6 - 42.4) 11944 | 34.9 (33.1 - 36.7) 11029  | 44.8 (43.2 - 46.3) 3464  | 38.9 (37.5 - 40.4) 8126  | 22.8 (21.4 - 24.2) 4986   |
| Employment status  |                          |                          |                           |                          |                          |                           |
| Not employed       | 54 (52.8 - 55.3) 10329   | 59.5 (58.3 - 60.6) 17441 | 55.3 (54.2 - 56.4) 16829  | 47.0 (45.9 - 48.0) 13776 | 66.2 (65.0 - 67.4) 14295 | 59.8 (58.6 - 60.9) 13423  |
| Employed           | 46.0 (44.7 - 47.2) 7680  | 40.5 (39.4 - 41.7) 12069 | 44.7 (43.6 - 45.8) 12748  | 53.0 (52.0 - 54.1) 14436 | 33.8 (32.6 - 35.0) 6843  | 40.2 (39.1 - 41.4) 8001   |
| Education level    |                          |                          |                           |                          |                          |                           |
| Not educated       | 6.7 (6.0 - 7.4) 1579     | 9.1 (8.6 - 9.6) 2502     | 12.9 (11.9 - 14.0) 4403   | 7.1 (6.6 - 7.6) 2486     | 4.9 (4.3 - 5.7) 1121     | 1.9 (1.7 - 2.1) 518       |
| Primary            | 23.3 (22.2 - 24.5) 4994  | 61.6 (60.3 - 62.8) 17643 | 61.5 (60.4 - 62.6) 18231  | 55.7 (54.3 - 57.0) 16061 | 41.9 (40.2 - 43.6) 9164  | 25.1 (24.1 - 26.2) 6143   |
| Secondary          | 58.0 (56.4 - 59.5) 9972  | 25.3 (24.2 - 26.3) 7921  | 20.3 (19.3 - 21.4) 5593   | 26.2 (25.3 - 27.2) 6819  | 44.8 (43.2 - 46.3) 9170  | 64.8 (63.6 - 66.0) 13314  |
| Higher             | 12.0 (10.5 - 13.6) 1464  | 4.1 (3.6 - 4.7) 1444     | 5.3 (4.7 - 5.9) 1350      | 11.1 (10.2 - 12.0) 2846  | 8.4 (7.4 - 9.6) 1683     | 8.2 (7.2 - 9.3) 1449      |
| Wealth quintiles   |                          |                          |                           |                          |                          |                           |
| Q1: Poorest        | 19.2 (17.8 - 20.7) 4610  | 18.7 (16.8 - 20.7) 5054  | 18.6 (16.4 - 21.1) 6155   | 20.5 (19.2 - 22.0) 7631  | 15.0 (13.6 - 16.5) 3357  | 19.2 (17.7 - 20.9) 4965   |
| Q2                 | 19.8 (18.0 - 21.8) 4122  | 19.0 (17.5 - 20.6) 5275  | 20.3 (18.7 - 21.9) 6154   | 19.6 (18.1 - 21.2) 5618  | 18.0 (16.6 - 19.5) 3931  | 19.6 (18.5 - 20.8) 4487   |
| Q3                 | 21.4 (19.4 - 23.5) 3827  | 19.9 (18.6 - 21.2) 5543  | 20.8 (19.3 - 22.4) 6583   | 19.7 (18.3 - 21.2) 5240  | 20.0 (18.3 - 21.8) 4274  | 19.2 (17.8 - 20.7) 4122   |
| Q4                 | 20.3 (18.2 - 22.6) 3077  | 20.8 (19.3 - 22.3) 5856  | 19.6 (17.8 - 21.6) 5510   | 19.8 (18.4 - 21.3) 4611  | 21.7 (19.6 - 24.0) 4526  | 19.7 (17.8 - 21.9) 3637   |
| Q5: Wealthiest     | 19.3 (16.7 - 22.1) 2373  | 21.7 (19.3 - 24.4) 7782  | 20.7 (18.7 - 22.8) 5175   | 20.3 (18.1 - 22.7) 5112  | 25.2 (22.7 - 28.0) 5050  | 22.2 (20.1 - 24.4) 4213   |

Q1 Quintiles 1: Poorest, Q5: Wealthiest. IQR Interquartile range

204 The proportion of the general population receiving social protection varied from 5.2% (95% CI 4.5%–  
205 6.0%) in Ethiopia to 39.9% (37.0%–42.8%) in Eswatini. Among PLHIV households, the proportion  
206 receiving social protection varied from 6.9% (5.7%–8.4%) among MLHIV in Zambia to 45.0% (41.2–  
207 49.0) among WLHIV in Namibia. Among AGYW, the proportion varied from 4.4% (3.6–5.3) in Ethiopia  
208 to 44.6% (40.8–48.5) in Eswatini.

209 The proportion of the general population reporting receiving social protection from the poorest wealth  
210 quintile (Q1) ranged from 8.1% (6.4%–10.2%) in Cameroon to 56.2% (51.5%–60.7%) in Eswatini.  
211 Among the wealthiest quintiles (Q5), the proportion ranged from 3.6% (2.6%–5.0%) in Ethiopia to  
212 19.7% (16.25–23.8%) in Namibia (Table 2). In general, 15% or less of the respondents from Q1  
213 reported receiving social protection in eight countries (i.e., Cameroon, Côte d'Ivoire, Ethiopia, Kenya,  
214 Malawi, Tanzania, Uganda, and Zambia), with 10% or less in three countries (Cameroon, Côte  
215 d'Ivoire, and Ethiopia); 15%–20% in Rwanda, 30% in Zimbabwe, 40% in Lesotho, and more than 50%  
216 in Eswatini and Namibia.

**Table 2: Survey weighted household social protection coverage for the general population, among people living with HIV (male and female), and adolescent girls and adolescent girls and young women by country (PHIA 2015-2019) (percent, 95% confidence interval)**

|                        | Cameroon           |                     |                     | Côte d'Ivoire§     |                     |                     | Eswatini           |                    |                     |                     |                     |
|------------------------|--------------------|---------------------|---------------------|--------------------|---------------------|---------------------|--------------------|--------------------|---------------------|---------------------|---------------------|
|                        | Gen pop            | MLHIV               | WLHIV               | AGYW               | Gen pop             | WLHIV               | AGYW               | Gen pop            | MLHIV               | WLHIV               | AGYW                |
| Coverage               | 16.3 (14.7 - 18.0) | 13.3 (8.9 - 19.5)‡  | 18.3 (14.9 - 22.4)  | 17.4 (15.4 - 19.7) | 11.7 (10.3 - 13.2)  | 11.9 (7.9 - 17.4)‡  | 12.8 (10.8 - 15.1) | 39.9 (37.0 - 42.8) | 37.0 (32.6 - 41.5)  | 39.2 (35.6 - 43.0)  | 44.6 (40.8 - 48.5)  |
| Residence Rural        | 15.0 (12.7 - 17.7) | ---                 | 21.3 (15.3 - 28.9)  | 15.3 (12.5 - 18.5) | 11.7 (9.7 - 14.0)   | ---                 | 9.8 (7.4 - 12.9)   | 46.1 (43.1 - 49.2) | 44.8 (39.7 - 50.1)  | 46.1 (41.9 - 50.4)  | 50.7 (46.6 - 54.7)  |
| Urban                  | 17.5 (15.4 - 19.7) | ---                 | 16.0 (12.1 - 20.9)  | 19.4 (16.4 - 22.9) | 11.7 (9.9 - 13.7)   | 9.6 (5.6 - 16.0)‡   | 14.1 (11.5 - 17.1) | 23.7 (17.5 - 31.3) | 20.4 (14.6 - 27.8)  | 22.9 (17.4 - 29.5)  | 26.9 (18.3 - 37.8)  |
| Employment status      |                    |                     |                     |                    |                     |                     |                    |                    |                     |                     |                     |
| Not employed           | 13.2 (11.8 - 14.9) | ---                 | 11.6 (7.9 - 16.8)‡  | 16.2 (14.2 - 18.3) | 12.2 (10.6 - 13.9)  | 14.6 (8.8 - 23.3)‡  | 13.3 (10.9 - 16.0) | 43.9 (40.9 - 46.9) | 43.0 (36.7 - 49.6)  | 42.2 (38.3 - 46.2)  | 45.9 (41.8 - 50.2)  |
| Employed               | 18.8 (16.9 - 20.9) | 15.2 (10.0 - 22.3)‡ | 24.1 (18.7 - 30.4)  | 20.9 (17.5 - 24.7) | 11.1 (9.6 - 12.8)   | ---                 | 11.2 (8.5 - 14.7)  | 34.6 (31.4 - 38.0) | 33.4 (28.5 - 38.7)  | 35.4 (30.4 - 40.7)  | 38.9 (32.6 - 45.6)  |
| Education level        |                    |                     |                     |                    |                     |                     |                    |                    |                     |                     |                     |
| Not educated           | 8.5 (7.0 - 10.2)   | ---                 | ---                 | 7.4 (5.2 - 10.5)‡  | 10.5 (8.9 - 12.4)   | ---                 | 10.3 (8.0 - 13.3)  | 40.6 (34.0 - 47.6) | ---                 | 44.3 (33.6 - 55.5)  | ---                 |
| Primary                | 16.1 (14.1 - 18.3) | ---                 | 19.1 (13.3 - 26.5)  | 12.6 (10.1 - 15.7) | 11.5 (9.9 - 13.3)   | ---                 | 10.6 (8.1 - 13.7)  | 46.6 (42.7 - 50.5) | 43.1 (36.4 - 50.1)  | 47.2 (41.8 - 52.6)  | 52.2 (45.3 - 59.0)  |
| Secondary              | 16.8 (14.8 - 19.1) | ---                 | 16.6 (12.0 - 22.6)‡ | 17.6 (14.9 - 20.7) | 13.9 (11.8 - 16.3)  | ---                 | 17.3 (14.1 - 21.1) | 39.3 (36.4 - 42.2) | 34.1 (29.3 - 39.3)  | 35.9 (31.9 - 40.1)  | 43.3 (39.3 - 47.4)  |
| Higher                 | 19.6 (17.3 - 22)   | ---                 | ---                 | 24.0 (20.1 - 28.5) | 10.7 (7.4 - 15.2)   | ---                 | ---                | 26.5 (21.7 - 32.0) | ---                 | 26.2 (16.8 - 8.5)‡  | 34.0 (22.0 - 48.5)‡ |
| Wealth quintiles       |                    |                     |                     |                    |                     |                     |                    |                    |                     |                     |                     |
| Q 1: Poorest           | 8.1 (6.4 - 10.2)   | ---                 | ---                 | 8.0 (5.9 - 10.7)   | 9.1 (6.5 - 12.5)    | ---                 | 9.7 (6.0 - 15.5)   | 56.2 (51.6 - 60.7) | 49.2 (40.9 - 57.6)  | 52.6 (47.4 - 57.8)  | 60.0 (53.2 - 66.4)  |
| Q 2                    | 18.8 (15.5 - 22.5) | ---                 | 24.2 (17.4 - 32.6)‡ | 16.4 (12.9 - 20.5) | 11.6 (9.5 - 14.1)   | ---                 | 14.9 (11.2 - 19.5) | 51.7 (46.6 - 56.7) | 45.5 (37.2 - 54.2)  | 53.8 (46.5 - 60.9)  | 56.0 (49.4 - 62.4)  |
| Q 3                    | 17.1 (14.0 - 20.6) | ---                 | 16.7 (11.1 - 24.3)‡ | 20.0 (16.0 - 24.7) | 14.9 (12.4 - 17.8)  | ---                 | 20.5 (15.7 - 26.4) | 41.6 (36.9 - 46.4) | 41.4 (32.8 - 50.5)  | 42.5 (35.7 - 49.5)  | 45.7 (39.1 - 52.5)  |
| Q 4                    | 19.7 (17.1 - 22.8) | ---                 | ---                 | 22.6 (18.5 - 27.3) | 13.6 (11.1 - 16.6)  | ---                 | 9.7 (7.3 - 12.8)   | 28.1 (23.9 - 32.7) | 25.9 (18.5 - 35.0)‡ | 23.0 (17.3 - 29.9)  | 29.5 (23.7 - 36.2)  |
| Q5 Wealthiest          | 17.9 (14.9 - 21.3) | ---                 | ---                 | 20.0 (15.5 - 25.5) | 9.9 (7.2 - 13.3)    | ---                 | 9.5 (5.8 - 15.3)   | 19.2 (14.2 - 25.4) | 18.6 (11.7 - 28.3)‡ | 17.2 (13.4 - 21.8)‡ | 20.3 (13.3 - 29.8)  |
|                        |                    |                     |                     |                    |                     |                     |                    |                    |                     |                     |                     |
|                        | Ethiopia§          |                     |                     | Kenya              |                     |                     | Lesotho            |                    |                     |                     |                     |
|                        | Gen pop            | WLHIV               | AGYW                | Gen pop            | MLHIV               | WLHIV               | AGYW               | Gen pop            | MLHIV               | WLHIV               | AGYW                |
| <b>Coverage</b>        | 5.2 (4.5 - 6.0)    | 11.4 (8.3 - 15.3)   | 4.4 (3.6 - 5.3)     | 14.1 (13.1 - 15.1) | 14.8 (10.4 - 20.7)  | 17.4 (14.5 - 20.7)  | 11.7 (10.1 - 13.6) | 24.0 (22.3 - 25.9) | 22.7 (19.8 - 25.9)  | 23.6 (21.3 - 26.0)  | 26.7 (24.2 - 29.3)  |
| <b>Residence Rural</b> | 5.6 (4.5 - 6.9)    | ---                 | 5.0 (3.9 - 6.5)     | 16.2 (15.0 - 17.6) | 13.7 (9.8 - 18.9)‡  | 19.2 (15.5 - 23.5)  | 14.6 (12.3 - 17.3) | 32.6 (30.3 - 35.0) | 30.7 (26.8 - 34.8)  | 33.7 (30.5 - 37.1)  | 34.7 (31.3 - 38.2)  |
| Urban                  | 4.8 (3.9 - 5.8)    | 11.4 (8.3 - 15.3)   | 3.7 (2.8 - 5.0)     | 10.8 (9.3 - 12.5)  | ---                 | 14.4 (10.1 - 19.9)  | 7.9 (6.0 - 10.3)   | 11.9 (9.4 - 14.9)  | 11.3 (7.8 - 16.0)‡  | 11.0 (8.3 - 14.6)   | 15.6 (12.3 - 19.4)  |
| Employment status      |                    |                     |                     |                    |                     |                     |                    |                    |                     |                     |                     |
| Not employed           | 5.2 (4.3 - 6.1)    | 11.6 (7.8 - 17.0)‡  | 4.6 (3.7 - 5.7)     | 13.8 (12.6 - 15.0) | ---                 | 16.5 (12.8 - 20.9)  | 11.8 (9.9 - 13.8)  | 28.0 (26.1 - 30.1) | 30.3 (26.3 - 34.6)  | 27.8 (24.7 - 31.1)  | 28.4 (25.6 - 31.3)  |
| Employed               | 5.2 (4.4 - 6.1)    | 11.1 (6.9 - 17.2)   | 3.8 (2.8 - 5.2)‡    | 14.3 (13.1 - 15.6) | 15.0 (10.4 - 21.3)‡ | 18.3 (14.2 - 23.3)  | 11.7 (9.1 - 14.9)  | 17.8 (15.9 - 19.9) | 15.7 (12.3 - 19.9)  | 17.4 (14.7 - 20.5)  | 17.7 (13.6 - 22.8)  |
| Education level        |                    |                     |                     |                    |                     |                     |                    |                    |                     |                     |                     |
| Not educated           | 8.1 (6.5 - 10.1)   | ---                 | ---                 | 14.0 (11.7 - 16.7) | ---                 | ---                 | 9.0 (5.1 - 15.5)‡  | 28.5 (24.1 - 33.4) | 20.8 (15.2 - 27.7)‡ | ---                 | ---                 |
| Primary                | 6.3 (5.3 - 7.5)    | 14.1 (9.3 - 20.7)‡  | 4.0 (2.9 - 5.4)     | 15.3 (14.1 - 16.5) | 17.3 (10.9 - 26.2)‡ | 15.4 (12.4 - 18.9)  | 13.0 (10.4 - 16.0) | 29.0 (26.8 - 31.4) | 25.5 (21.4 - 30.1)  | 28.9 (25.7 - 32.3)  | 36.2 (31.3 - 41.4)  |
| Secondary              | 4.3 (3.5 - 5.2)    | ---                 | 4.3 (3.3 - 5.5)     | 13.3 (12.1 - 14.7) | ---                 | 20.3 (14.5 - 27.6)‡ | 11.3 (9.0 - 14.1)  | 21.1 (19.1 - 23.3) | 20.1 (15.3 - 26.0)  | 18.3 (15.3 - 21.6)  | 23.6 (21.1 - 26.2)  |
| Higher                 | 3.2 (2.6 - 4.0)    | ---                 | 4.8 (3.3 - 7.1)‡    | 11.4 (9.2 - 13.9)  | ---                 | ---                 | 10.6 (6.7 - 16.3)‡ | 15.7 (11.7 - 20.6) | ---                 | ---                 | 26.4 (18.5 - 36.1)‡ |
| Wealth quintiles       |                    |                     |                     |                    |                     |                     |                    |                    |                     |                     |                     |
| Q 1: Poorest           | 8.2 (6.7 - 10.1)   | ---                 | 8.1 (5.8 - 11.2)    | 17.0 (15.2 - 19.1) | ---                 | 17.9 (12.9 - 24.2)‡ | 14.6 (11.2 - 18.7) | 40.0 (36.1 - 44.0) | 38.7 (32.2 - 45.7)  | 44.5 (38.6 - 50.5)  | 44.4 (38.7 - 50.2)  |
| Q 2                    | 4.2 (3.2 - 5.5)    | ---                 | ---                 | 17.3 (15.3 - 19.5) | ---                 | 19.6 (14.5 - 26.0)‡ | 15.2 (11.5 - 19.9) | 37.8 (34.2 - 41.4) | 31.5 (25.7 - 38.0)  | 34.5 (29.8 - 39.6)  | 37.4 (32.3 - 42.9)  |
| Q 3                    | 5.7 (4.5 - 7.0)    | ---                 | 5.1 (3.6 - 7.0)     | 17.4 (15.6 - 19.4) | ---                 | 18.7 (13.1 - 26.0)‡ | 20.1 (15.2 - 26.1) | 22.6 (19.5 - 26.0) | 18.4 (13.6 - 24.4)‡ | 19.6 (15.5 - 24.5)  | 26.0 (21.9 - 30.6)  |
| Q 4                    | 5.0 (3.6 - 6.8)    | ---                 | ---                 | 11.9 (10.1 - 13.8) | ---                 | 16.7 (10.8 - 25.1)‡ | 6.9 (4.4 - 10.5)‡  | 13.5 (11.1 - 16.3) | ---                 | 12.9 (9.6 - 17.3)   | 13.6 (10.3 - 17.7)  |
| Q5 Wealthiest          | 3.6 (2.6 - 5.0)    | ---                 | 3.4 (2.3 - 5.2)‡    | 6.2 (4.6 - 8.3)    | ---                 | ---                 | ---                | 11.5 (8.4 - 15.6)  | ---                 | 11.6 (7.9 - 16.7)‡  | 16.4 (11.5 - 22.9)  |

Gen pop is General population; MLHIV is Men living with HIV; WLHIV is women living with HIV; AGYW is adolescent girls and young women --- Results had fewer than 25 observations and are not shown. § results for MLHIV were less than 25 observations and are not shown. \_\_\_ data set had no variable. ‡ Estimate based on 25-49 observations and should be interpreted with caution. Ethiopia data set had data from urban settings

**Table 2: Survey weighted household social protection coverage of general population, people living with HIV (male and female), adolescent girls and young women by country (PHIA 2015-2019) (percent, 95% confidence interval) continued**

|                   | Malawi             |                    |                     |                    | Namibia            |                     |                    |                     | Rwanda§            |                    |                    |
|-------------------|--------------------|--------------------|---------------------|--------------------|--------------------|---------------------|--------------------|---------------------|--------------------|--------------------|--------------------|
|                   | Gen pop            | MLHIV              | WLHIV               | AGYW               | Gen pop            | MLHIV               | WLHIV              | AGYW                | Gen pop            | WLHIV              | AGYW               |
| General coverage  | 14.8 (13.6 - 16.2) | 14.7 (11.8 - 18.3) | 14.5 (12.4 - 16.9)  | 15.1 (13.3 - 17.1) | 36.1 (34.3 - 38.0) | 38.4 (33.2 - 43.8)  | 45.0 (41.2 - 49.0) | 40.5 (37.6 - 43.5)  | 10.4 (9.3 - 11.5)  | 11.6 (8.6 - 15.5)  | 11.0 (9.7 - 12.5)  |
| Residence:        |                    |                    |                     |                    |                    |                     |                    |                     |                    |                    |                    |
| Rural             | 16.6 (15.1 - 18.2) | 17.7 (14.0 - 22.1) | 17.0 (14.3 - 20.1)  | 16.8 (14.7 - 19.1) | 51.6 (48.7 - 54.4) | 52.5 (46.3 - 58.7)  | 57.3 (53.2 - 61.3) | 55.8 (51.8 - 59.7)  | 11.7 (10.5 - 13.1) | 14.4 (10.5 - 19.3) | 12.3 (10.8 - 14.1) |
| Urban             | 7.8 (6.0 - 10.0)   | ---                | 7.9 (5.8 - 10.6)‡   | 8.5 (5.3 - 13.3)   | 25.1 (22.7 - 27.6) | 25.2 (18.7 - 33.0)  | 32.5 (26.7 - 38.9) | 28.4 (24.4 - 32.8)  | 5.1 (3.8 - 6.8)    | ---                | 6.0 (4.2 - 8.4)    |
| Employment status |                    |                    |                     |                    |                    |                     |                    |                     |                    |                    |                    |
| Not employed      | 14.9 (13.5 - 16.4) | 17.9 (13.4 - 23.5) | 14.8 (12.2 - 17.8)  | 15.1 (13.1 - 17.2) | 45.0 (42.8 - 47.2) | 50.0 (43.1 - 56.9)  | 50.7 (46.5 - 54.8) | 43.4 (40.1 - 46.9)  | 10.6 (9.4 - 11.8)  | 10.0 (6.9 - 14.3)‡ | 10.9 (9.5 - 12.4)  |
| Employed          | 14.7 (13.1 - 16.4) | 11.5 (8.2 - 16.0)‡ | 13.8 (9.9 - 18.9)‡  | 15.2 (11.7 - 19.3) | 25.7 (23.8 - 27.6) | 27.3 (21.3 - 34.2)  | 33.9 (28.1 - 40.3) | 28.3 (23.5 - 33.6)  | 10.1 (8.9 - 11.4)  | 14.2 (9.6 - 20.6)‡ | 11.2 (9.2 - 13.6)  |
| Education level   |                    |                    |                     |                    |                    |                     |                    |                     |                    |                    |                    |
| Not educated      | 15.7 (13.2 - 18.7) | ---                | 19.4 (13.9 - 6.4)‡  | ---                | 36.5 (32.7 - 40.4) | 36.2 (24.4 - 50.0)‡ | 44.5 (33.9 - 55.7) | 41.4 (30.7 - 52.9)  | 13.9 (12.2 - 5.8)  | ---                | ---                |
| Primary           | 15.3 (13.9 - 16.9) | 15.2 (11.5 - 19.9) | 14.9 (12.2 - 18.1)  | 15.4 (13.2 - 17.8) | 45.1 (42.2 - 48.0) | 40.2 (33.0 - 47.8)  | 47.9 (42.0 - 53.8) | 50.3 (45.0 - 55.6)  | 11.1 (9.9 - 12.4)  | 12.1 (8.6 - 16.8)‡ | 12.9 (11.1 - 14.8) |
| Secondary         | 14.1 (12.5 - 15.9) | ---                | 9.9 (6.4 - 14.9)‡   | 15.6 (13.0 - 18.7) | 35.8 (33.8 - 37.8) | 36.0 (29.4 - 43.1)  | 44.0 (39.7 - 48.5) | 40.2 (37.4 - 43.1)  | 8.5 (7.3 - 9.8)    | ---                | 9.2 (7.7 - 10.9)   |
| Higher            | 7.8 (5.6 - 10.7)   | ---                | ---                 | ---                | 20.1 (16.4 - 24.3) | ---                 | ---                | 23.0 (13.5 - 36.2)‡ | 3.5 (2.2 - 5.4)    | ---                | ---                |
| Wealth quintiles  |                    |                    |                     |                    |                    |                     |                    |                     |                    |                    |                    |
| Q 1: Poorest      | 14.8 (12.5 - 17.4) | ---                | 14.5 (9.2 - 22.1)‡  | 12.8 (9.3 - 17.5)  | 51.1 (47.6 - 54.7) | 48.7 (40.5 - 56.9)  | 55.8 (50.1 - 61.4) | 54.1 (49.4 - 58.6)  | 17.1 (14.9 - 19.5) | ---                | 18.7 (15.1 - 22.8) |
| Q 2               | 16.5 (14.0 - 19.3) | ---                | 19.9 (14.1 - 27.3)‡ | 16.4 (13.0 - 20.5) | 48.7 (45.1 - 52.4) | 51.3 (42.3 - 60.1)  | 57.5 (50.7 - 64.1) | 56.3 (50.7 - 61.7)  | 14.2 (12.2 - 16.6) | ---                | 14.0 (11.1 - 17.5) |
| Q 3               | 17.0 (14.5 - 19.8) | ---                | 16.8 (11.6 - 23.6)‡ | 16.4 (13.2 - 20.3) | 37.2 (33.5 - 41.1) | 37.5 (28.7 - 47.1)  | 41.9 (35.0 - 49.1) | 41.1 (34.9 - 47.6)  | 10.6 (8.7 - 12.9)  | ---                | 13.5 (10.6 - 17.2) |
| Q 4               | 17.2 (14.6 - 20.1) | ---                | 15.8 (11.2 - 21.9)‡ | 17.3 (13.9 - 21.4) | 24.1 (20.7 - 27.8) | ---                 | 23.8 (15.9 - 34.1) | 25.6 (20.7 - 31.1)  | 8.7 (7.2 - 10.6)   | ---                | 8.2 (6.1 - 10.9)   |
| Q5 Wealthiest     | 9.7 (8.0 - 11.7)   | ---                | 9.1 (6.2 - 13.0)‡   | 12.4 (8.9 - 17)    | 19.7 (16.2 - 23.8) | ---                 | ---                | 22.5 (17.2 - 28.8)  | 2.6 (1.9 - 3.6)    | ---                | 2.5 (1.5 - 4.0)‡   |
|                   |                    |                    |                     |                    |                    |                     |                    |                     |                    |                    |                    |
|                   | Tanzania           |                    |                     |                    | Uganda§            |                     |                    |                     | Zambia             |                    |                    |
|                   | Gen pop            | MLHIV              | WLHIV               | AGYW               | Gen pop            | WLHIV               | AGYW               | Gen pop             | MLHIV              | WLHIV              | AGYW               |
| General coverage  | 8.8 (8.0 - 9.7)    | 10.7 (7.6 - 15.0)  | 13.8 (11.2 - 17.0)  | 8.8 (7.6 - 10.1)   | 10.4 (9.5 - 11.3)  | 10.5 (8.5 - 12.8)   | 10.9 (9.7 - 12.2)  | 7.8 (6.8 - 8.9)     | 6.3 (4.7 - 8.6)    | 7.3 (5.9 - 8.9)    | 8.1 (6.8 - 9.7)    |
| Residence:        |                    |                    |                     |                    |                    |                     |                    |                     |                    |                    |                    |
| Rural             | 9.7 (8.6 - 10.9)   | 11.6 (7.7 - 17.3)‡ | 13.6 (10.0 - 18.3)  | 10.0 (8.5 - 11.8)  | 11.0 (10.0 - 12.2) | 11.0 (8.6 - 13.9)   | 11.9 (10.4 - 13.5) | 9.2 (7.7 - 11.0)    | 8.5 (5.9 - 12.0)‡  | 8.9 (6.6 - 11.7)   | 9.3 (7.3 - 11.7)   |
| Urban             | 7.4 (6.2 - 8.9)    | ---                | 14.1 (10.5 - 18.5)  | 7.0 (5.4 - 9.1)    | 8.8 (7.1 - 10.7)   | 9.7 (6.6 - 14.0)‡   | 8.7 (6.8 - 11.2)   | 6.1 (5.1 - 7.4)     | ---                | 6.2 (4.5 - 8.6)    | 6.9 (5.4 - 8.8)    |
| Employment status |                    |                    |                     |                    |                    |                     |                    |                     |                    |                    |                    |
| Not employed      | 8.9 (8.0 - 9.9)    | ---                | 15.4 (11.9 - 19.8)  | 8.5 (7.4 - 9.9)    | 10.7 (9.7 - 11.9)  | 11.5 (8.8 - 14.9)   | 12.0 (10.5 - 13.6) | 8.0 (6.8 - 9.3)     | ---                | 7.0 (5.5 - 8.7)    | 8.1 (6.7 - 9.7)    |
| Employed          | 8.8 (7.8 - 9.9)    | 11.8 (7.8 - 17.6)‡ | 11.6 (8.3 - 15.9)   | 9.5 (7.4 - 12.2)   | 10.1 (9.2 - 11.1)  | 9.6 (7.1 - 12.9)    | 8.7 (7.2 - 10.6)   | 7.5 (6.5 - 8.6)     | 6.4 (4.3 - 9.3)‡   | 8.1 (5.6 - 11.5)‡  | 8.4 (6.2 - 11.3)   |
| Education level   |                    |                    |                     |                    |                    |                     |                    |                     |                    |                    |                    |
| Not educated      | 11.0 (9.1 - 13.1)  | ---                | 12.3 (7.2 - 20.3)‡  | 10.5 (7.4 - 14.7)‡ | 11.1 (9.0 - 13.5)  | ---                 | 12.3 (7.7 - 19.2)‡ | 10.1 (6.8 - 14.6)   | ---                | ---                | ---                |
| Primary           | 9.1 (8.1 - 10.1)   | 10.7 (7.3 - 15.5)‡ | 15.3 (12.1 - 19.0)  | 9.3 (7.7 - 11.1)   | 10.2 (9.3 - 11.1)  | 9.7 (7.4 - 12.6)    | 10.9 (9.5 - 12.4)  | 8.7 (7.3 - 10.2)    | ---                | 6.7 (5.1 - 8.9)    | 7.4 (5.6 - 9.7)    |
| Secondary         | 7.8 (6.7 - 9.0)    | ---                | ---                 | 8.2 (6.7 - 10.0)   | 10.9 (9.6 - 12.4)  | ---                 | 11.1 (9.2 - 13.4)  | 7.0 (6.1 - 8.1)     | 6.0 (3.8 - 9.4)‡   | 7.1 (5.3 - 9.4)‡   | 8.2 (6.8 - 9.8)    |
| Higher            | 4.7 (3.2 - 6.8)    | ---                | ---                 | ---                | 9.8 (8.4 - 11.5)   | ---                 | 9.7 (7.1 - 13.1)   | 6.6 (4.7 - 9.0)     | ---                | ---                | ---                |
| Wealth quintiles  |                    |                    |                     |                    |                    |                     |                    |                     |                    |                    |                    |
| Q 1: Poorest      | 14.0 (11.9 - 16.4) | ---                | 19.6 (13.5 - 27.6)‡ | 13.8 (10.8 - 17.5) | 13.4 (11.9 - 15.0) | 13.6 (9.0 - 19.9)‡  | 13.9 (12.0 - 16.0) | 9.6 (7.3 - 12.7)    | ---                | ---                | 8.8 (5.8 - 13.2)   |
| Q 2               | 11.0 (9.2 - 13.0)  | ---                | 16.5 (10.9 - 24.1)‡ | 10.9 (8.1 - 14.4)  | 11.3 (9.4 - 13.5)  | ---                 | 12.3 (9.9 - 15.2)  | 7.5 (6.1 - 9.3)     | ---                | ---                | 8.3 (6.0 - 11.5)   |
| Q 3               | 8.3 (7.0 - 9.9)    | ---                | 14.7 (10.5 - 20.3)‡ | 10.5 (7.8 - 14.0)  | 9.5 (7.6 - 11.7)   | ---                 | 10.2 (7.5 - 13.8)  | 10.6 (8.3 - 13.4)   | ---                | 7.5 (4.8 - 11.8)‡  | 9.0 (6.4 - 12.5)   |
| Q 4               | 6.9 (5.3 - 8.9)    | ---                | ---                 | 7.0 (5.0 - 9.8)    | 10.7 (8.7 - 13.1)  | 11.8 (8.3 - 16.6)‡  | 10.8 (8.3 - 14.0)  | 6.1 (4.9 - 7.5)     | ---                | 6.0 (4.1 - 8.7)‡   | 7.8 (5.6 - 10.9)   |
| Q5 Wealthiest     | 4.4 (3.3 - 5.9)    | ---                | ---                 | 3.5 (2.1 - 5.8)‡   | 7.1 (5.6 - 8.9)    | ---                 | 7.5 (5.5 - 10.3)   | 6.3 (4.8 - 8.1)     | ---                | 6.6 (4.4 - 9.9)‡   | 7.3 (5.3 - 9.9)    |

Gen pop General population; MLHIV Men living with HIV; WLHIV women living with HIV; AGYW adolescent girls and young women --- Results had fewer than 25 observations and are not shown. § Results had fewer than 25 observations and are not shown for MLHIV including in Uganda where general coverage was 11.5 (8.8 - 14.8), for rural 11.5 (8.4 - 15.6) employed 12.2 (8.9 - 16.4) and primary education). --- data set had no variable. ‡ Estimate based on 25-49 observations and should be interpreted with caution.

**Table 2: Survey weighted household social protection coverage of the general population, people living with HIV (male and female), and adolescent girls and young women by country (PHIA 2015-2019) (percent, 95% confidence interval)**

| <b>Zimbabwe</b>         |                    |                     |                    |                     |
|-------------------------|--------------------|---------------------|--------------------|---------------------|
|                         | <b>Gen pop</b>     | <b>MLHIV</b>        | <b>WLHIV</b>       | <b>AGYW</b>         |
| General coverage        | 19.9 (18.6 - 21.2) | 18.6 (16.1 - 21.3)  | 18.4 (16.4 - 20.5) | 20.0 (18.3 - 21.8)  |
| Residence: Rural        | 26.8 (24.9 - 28.7) | 25.2 (21.8 - 28.9)  | 25.4 (22.6 - 28.4) | 27.1 (24.6 - 29.8)  |
| Urban                   | 7.6 (6.2 - 9.2)    | ---                 | 7.1 (5.0 - 10.0)   | 8.9 (7.1 - 11.1)    |
| Employment status       |                    |                     |                    |                     |
| Not employed            | 21.7 (20.3 - 23.1) | 20.8 (17.1 - 25.1)  | 18.5 (16.3 - 21.0) | 20.7 (18.8 - 22.7)  |
| Employed                | 17.2 (15.7 - 18.7) | 16.4 (13.5 - 19.8)  | 18.1 (14.8 - 21.9) | 17.6 (14.7 - 20.8)  |
| Education level         |                    |                     |                    |                     |
| Not educated            | 23.0 (19.1 - 27.4) | ---                 | ---                | ---                 |
| Primary                 | 22.3 (21.1 - 24.8) | 16.8 (12.9 - 21.6)  | 20.4 (17.6 - 23.5) | 20.9 ( 17.5 - 24.8) |
| Secondary               | 19.7 (18.3 - 21.2) | 19.6 (16.5 - 23.1)  | 17.6 (15.0 - 20.6) | 20.2 (18.3 - 22.3)  |
| Higher                  | 10.9 (8.7 - 13.4)  | ---                 | ---                | 12.9 (7.8 - 20.6)‡  |
| <b>Wealth quintiles</b> |                    |                     |                    |                     |
| Q 1: Poorest            | 30.7 (27.9 - 33.7) | 27.8 (22.0 - 34.5)  | 30.9 (26.2 - 36.0) | 30.7 (26.4 - 35.3)  |
| Q 2                     | 32.1 (29.4 - 34.9) | 32.5 (26.2 - 39.5)  | 28.4 (23.3 - 34.2) | 32.5 (28.4 - 36.8)  |
| Q 3                     | 22.8 (20.0 - 25.9) | 18.8 (13.0 - 26.4)‡ | 22.6 (17.2 - 29.0) | 23.4 (19.5 - 27.8)  |
| Q 4                     | 7.5 (5.8 - 9.5)    | ---                 | 5.6 (4.0 - 8.8)‡   | 8.3 (5.9 - 11.5)    |
| Q5 Wealthiest           | 8.1 (6.4 - 10.2)   | ---                 | 7.8 (5.2 - 11.3)‡  | 9.9 (7.6 - 12.7)    |

Gen pop General population; MLHIV Men living with HIV; WLHIV women living with HIV; AGYW adolescent girls and young women --- Results had fewer than 25 observations and were suppressed. \_\_\_ data set had no variable. ‡ Estimate based on 25–49 observations and should be interpreted with caution.

217

218

219

220

221

222

223

224

225

226

227

228

229

230 Figure 1 presents the concentration curves of access to social protection by country for the general  
231 population, MLHIV and WLHIV, and AGYW. Table 3 reports the associated concentration indices.  
232 The results show that socioeconomic inequalities in access to social protection were pro-rich only in  
233 Cameroon, among the general population, and AGYW—evident as the concentration curves lie below  
234 the line of equality—with a CIX value of 0.122 ( $p < 0.001$ ) among the general population and a CIX  
235 value of 0.169 ( $<0.001$ ) among AGYW. This result shows that more people from wealthier than poor  
236 households reported receiving social protection. In Côte d'Ivoire, socioeconomic inequalities in  
237 receiving social protection were pro-rich, but the associated CIX estimates were not significantly  
238 different from zero. In the remaining 11 countries, social protection was pro-poor. The CIX values for  
239 socioeconomic inequalities in receiving social protection in these countries ranged from  $-0.080$  ( $p =$   
240  $0.002$ ) among the general population in Malawi to  $-0.372$  ( $p < 0.001$ ) among WLHIV in Zimbabwe  
241 (Table 3).

242 In Eswatini, Lesotho, Rwanda, Namibia, and Zimbabwe, socioeconomic inequalities in receiving  
243 social protection were pro-poor, below  $-0.300$ , among all population groups. Socioeconomic  
244 inequalities in receiving social protection access were pro-poor and moderate, with CIX values  
245 ranging from  $-0.100$  to  $-0.300$  among the general population and AGYW in Ethiopia, Kenya, and  
246 Uganda and among the general population, WLHIV, and AGYW in Tanzania. Social protection was  
247 pro-poor and of low inequality, that is, between CIX  $-0.010$  and CIX  $= -0.100$  among the general  
248 population and MLHIV and WLHIV in Malawi, and the general population and MLHIV in Zambia  
249 (Figure 1 and Table 3).

250

251  
252  
253  
254  
255  
256  
257  
258  
259  
260  
261  
262  
263  
264  
265  
266  
267  
268  
269  
270  
271  
272  
273  
274

Figure 1: Concentration curves of receiving social protection among the general population, people living with HIV (women and men), and adolescent girls and young women in sub-Saharan African Countries (PHIA 2015-2019).

**Table 3: Survey weighted concentration index of socioeconomic inequalities in receiving social protection for the general population, people living with HIV (male and female) and adolescent girls and young women (CIX, p-value, sample size) PHIA 2015-2019**

|                | Cameroon |         |             | Cote D'Ivoire |         |             | Eswatini |         |             | Ethiopia |         |             | Kenya  |         |             | Lesotho |         |             | Malawi |         |             |
|----------------|----------|---------|-------------|---------------|---------|-------------|----------|---------|-------------|----------|---------|-------------|--------|---------|-------------|---------|---------|-------------|--------|---------|-------------|
|                | CIX      | p-value | sample size | CIX           | p-value | sample size | CIX      | p-value | sample size | CIX      | p-value | sample size | CIX    | p-value | sample size | CIX     | p-value | sample size | CIX    | p-value | sample size |
| Gen population | 0.122    | <0.001  | 24850       | 0.046         | 0.234   | 17268       | -0.320   | <0.001  | 9523        | -0.133   | 0.001   | 18449       | -0.175 | <0.001  | 21409       | -0.351  | <0.001  | 11640       | -0.080 | 0.002   | 16685       |
| WLHIV          | ---      | ---     | ---         | ---           | ---     | ---         | -0.326   | <0.001  | 1909        | ---      | ---     | ---         | -0.072 | 0.173   | 1016        | -0.369  | <0.001  | 2176        | -0.128 | 0.012   | 1475        |
| MLHIV          | ---      | ---     | ---         | ---           | ---     | ---         | -0.271   | <0.001  | 867         | ---      | ---     | ---         | ---    | ---     | ---         | -0.335  | <0.001  | 1016        | ---    | ---     | ---         |
| AGYW           | 0.169    | <0.001  | 4936        | 0.010         | 0.848   | 3163        | -0.324   | <0.001  | 1922        | -0.196   | 0.001   | 4773        | -0.249 | <0.001  | 2587        | -0.315  | <0.001  | 2350        | -0.017 | 0.658   | 3578        |

  

|                | Namibia |         |             | Rwanda |         |             | Tanzania |         |             | Uganda |         |             | Zambia |         |             | Zimbabwe |         |             |
|----------------|---------|---------|-------------|--------|---------|-------------|----------|---------|-------------|--------|---------|-------------|--------|---------|-------------|----------|---------|-------------|
|                | CIX     | p-value | sample size | CIX    | p-value | sample size | CIX      | p-value | sample size | CIX    | p-value | sample size | CIX    | p-value | sample size | CIX      | p-value | sample size |
| Gen population | -0.301  | <0.001  | 16220       | -0.299 | <0.001  | 29435       | -0.229   | <0.001  | 28289       | -0.115 | <0.001  | 27868       | -0.095 | 0.008   | 18991       | -0.353   | <0.001  | 19612       |
| WLHIV          | -0.291  | <0.001  | 1622        | ---    | ---     | ---         | ---      | ---     | ---         | ---    | ---     | ---         | ---    | ---     | ---         | -0.372   | <0.001  | 2151        |
| MLHIV          | -0.275  | <0.001  | 713         | ---    | ---     | ---         | ---      | ---     | ---         | ---    | ---     | ---         | ---    | ---     | ---         | -0.347   | <0.001  | 1084        |
| AGYW           | -0.306  | <0.001  | 3007        | -0.320 | <0.001  | 6063        | -0.249   | <0.001  | 5824        | -0.121 | 0.001   | 6315        | -0.043 | 0.340   | 4144        | -0.331   | <0.001  | 3927        |

---The results for the following countries and subpopulations were not shown because their observations for the wealth variables were fewer than 25: Cameroon, Côte d'Ivoire, Ethiopia, Rwanda, Tanzania, Uganda, and Zambia for MLHIV and WLHIV; Kenya and Malawi for MLHIV.



## 276 **4 Discussion**

277 This study examined economic-related inequality in receiving social protection among the general  
278 population, MLHIV and WLHIV, and AGYW in 13 sub-Saharan African countries. The study also  
279 evaluated whether people in the poorest households received social protection. Our findings showed  
280 that the proportion of the general population receiving social protection varied from 5.2% (95% CI  
281 4.5%–6.0%) in Ethiopia to 39.9% (37.0%–42.8%) in Eswatini. Social protection was pro-poor in 11 out  
282 of the 13 countries studied, implying that more people from poor households received social  
283 protection than those from wealthier households in these 11 countries. However, in eight of these 11  
284 countries, less than 15% of people from the poorest quintile households reported receiving social  
285 protection. Cameroon was the only country where social protection was pro-rich. These results bear  
286 considerable policy implications for the targeting, scale up, and equalization of access to social  
287 protection among the general population, MLHIV and WLHIV, and AGYW.

288 Our study's first results showed that the proportion of respondents receiving social protection varied  
289 widely, ranging from 4.4% among AGYW in Ethiopia to 44.6% among WLHIV in Namibia,  
290 corroborating the evidence. The International Labour Organisation (ILO) report 2020–2022 indicated  
291 that only 46.9% of the global population were covered by at least one social protection benefit in 2020  
292 [22]. The ILO report further highlighted considerable regional disparities in access to social protection,  
293 with the lowest coverage in Africa at 17.4% and the highest in Europe and Central Asia at 83.9% [22].  
294 A study covering Eswatini, Malawi, Tanzania, and Zambia found that the proportion receiving social  
295 protection varied from 7.7% in Zambia to 39.6% in Eswatini [23]. The paper found comparable social  
296 protection coverage among the AGYW and PLHIV to the general population in Malawi and Zambia  
297 [23].

298 Our second finding revealed that social protection was pro-poor in 11 of the 13 countries surveyed.  
299 The pro-poor social protection found in our study was expected and aligns with our hypothesis. Social  
300 protection programs are generally focused on the most impoverished households [11, 16, 17, 18]. In  
301 this regard, our findings are consistent with the core objectives of social protection, which prioritize the  
302 poorest households. However, in eight of the 11 countries, fewer than 15% of people from households  
303 in the bottom wealth quintile reported receiving social protection. A review of evidence from 123  
304 countries found that only 22% of the poorest 20% received social assistance in support of our finding

305 [24]. Cameroon stood out as an outlier, exhibiting pro-rich social protection, underscoring a significant  
306 shortfall in reaching people from the poorest households. A contributing factor to this disparity in  
307 Cameroon was the high access to social protection among employed individuals, indicating that the  
308 benefits were linked to their employment. For example, civil service pensions, which benefited only  
309 141,000 pensioners in 2016 in Cameroon, were allocated over 10 times more funding by the  
310 government of Cameroon than all social assistance schemes combined [25]. Another potential reason  
311 was the relatively nascent state of social protection in Cameroon [25]. Despite the development of a  
312 comprehensive social protection policy in 2017, the program was not approved. Social protection  
313 programs remained small-scale and uncoordinated [25]. This result shows a potential gap in reaching  
314 people from the poorest households.

315 The limited coverage of individuals from the poorest quintile households identified in our study may be  
316 due to difficulties faced by low-income countries in identifying the poorest population groups to target  
317 their social protection services [24]. Another reason may be the dynamic mobility of people across  
318 economic groups. For example, in the Occupied Palestine State, where 40% of individuals receiving  
319 social protection were categorized as poor, they moved up and down income groups over time [26].  
320 These findings underscore that pro-poor social protection alone is insufficient to reach people from  
321 the poorest households. Although policymakers may contemplate redistributing social protection  
322 benefits from wealthier to poor households, this approach may not be feasible or desirable. Wealthier  
323 households can descend into poverty, requiring social protection [26]. Another potential explanation  
324 could be the nontakeup of social protection benefits, a common phenomenon among marginalized  
325 populations who need social protection the most [27]. Nontakeup pertains to eligible individuals not  
326 accessing available benefits for a range of reasons, including lack of information, complex or costly  
327 procedures, limited access to digital technology and know-how, stigma, discrimination, shame, and  
328 fear of interacting with social services [27]. Moreover, people from the poorest households, eligible to  
329 access social protection, may not take up available social protection benefits owing to inadequate  
330 coverage and the narrow scope of programs [28]. According to our study, only in countries with an  
331 overall higher social protection coverage, such as Eswatini, Lesotho, Namibia, and Zimbabwe, the  
332 proportion of the poorest wealth quintile households reached were also high. A study examining  
333 global inequalities in accessing reproductive, maternal, newborn, and child health services showed  
334 that countries, with low inequality and high coverage in these services, effectively reached the poorest

335 women and children [29]. The coverage of social protection needs to be broadened and deepened to  
336 reach the poorest households. Additionally, strategies to identify households that are thrust into  
337 poverty owing to emerging risks, such as financial crises, conflicts, droughts, disasters, and  
338 pandemics like COVID-19, and link them to social protection, should be developed.

339 This study has several limitations and strengths. Contrary to the ILO's strategy of presenting  
340 summarized national responses to government-provided social protection [22], our study compiles  
341 individual responses from various countries through household surveys. Notwithstanding, our  
342 estimates correspond to the data from the ILO 2020–2022 report, indicating that our measurement  
343 reflects the same information that governments use in their reporting. Another limitation of our study is  
344 the absence of identification for marginalized people, such as gay men and other men who have sex  
345 with men, sex workers and migrants. Marginalized population groups suffer a bulk of hardships owing  
346 to inequalities [1, 2]. These population groups may be excluded from accessing social protection  
347 benefits often because of stigma, discrimination, and punitive laws [30]. The potential barriers to  
348 accessing social protection benefits of these subgroups were not addressed in this study. This gap  
349 stems from either a lack of available information or an insufficient sample size to conduct meaningful  
350 analysis. Furthermore, we did not disaggregate the specific social protection benefits received or their  
351 monetary value. Neither did we account for the rapid scale up of social protection in response to the  
352 COVID-19 pandemic, which would have provided more insights into our analysis.

## 353 **5. Conclusion**

354 In the countries surveyed, access to social protection for the general population, MLHIV and WLHIV,  
355 and AGYW was low but favored people from poor households. However, pro-poor social protection,  
356 although necessary, is not sufficient to ensure that people from the poorest households receive social  
357 protection. Further research is required to identify and reach people from the poorest households with  
358 social protection in sub-Saharan Africa.

## 359 **Competing interest**

360 Authors declare no competing interests.

361

## 362 **Author contributions**

363 DC designed the study. DC and SA-A collated the data. DC, SA-A, LH, ARH, MS, CM, JGJM, OK and  
364 JE performed the data analysis. DC and SA-A conducted the data visualization. DC and SA-A drafted  
365 and revised the manuscript. DC, SA-A, LH, ARH, MS, CM, JGJM, OK and JE critically reviewed the  
366 drafts. All authors approved the final manuscript.

367

## 368 **Acknowledgment**

369 The authors acknowledge comments from UNAIDS.

370

## 371 **Funding:**

372 The Swiss National Science Foundation (SNSF) grant number 202660 funded Olivier Keiser.

373

374 **Disclaimer:** Where authors are identified as personnel of the World Health Organization or  
375 UNAIDS, the authors alone are responsible for the views expressed in this article and they do not  
376 necessarily represent the decisions, policy, or views of the World Health Organization or UNAIDS.

## 377 REFERENCES

378

- 1 J. E. Stiglitz, "The Price of Inequality: How Today's Divided Society Endangers our Future," in *Sustainable Humanity Sustainable Nature Our Responsibility*, D. P. S, R. Veerabhadran and M. S. Sorondo, Eds., Vatican, The Pontifical Academy of Social Sciences, 2015, pp. 379 - 399.
- 2 Global leading economists, *Open Letter to the United Nations Secretary-General and President of the World Bank-Setting Serious Goals to Combat Inequality, 2023*.
- 3 International Labour Organization, "Inequalities and the world of work. Report IV," Geneva, 2021.
- 4 D. Perrons, "Gendering inequality: a note on Piketty's Capital in the twenty-first century," *Br J Sociol*, vol. 65(4), no. Doi: 10.1111/1468-4446.12114., pp. 667-77, Dec 2014.
- 5 S. M. S. Krammer, A. A. Lashitew, J. P. Doh and H. Bapuji, "Income inequality, social cohesion, and crime against businesses: Evidence from a global sample of firms," *J Int Bus Stud*, vol. 54 , no. 2: doi: 10.1057/s41267-022-00535-5, p. 385–400, June 2022.
- 6 S. G. Topuz, "The Relationship Between Income Inequality and Economic Growth: Are Transmission Channels Effective?," *Soc Indic Res*, vol. 162, no. Doi.org/10.1007/s11205-022-02882-0, p. 1177–1231, Jan 2022.
- 7 A. Deaton, "Health, Inequality, and Economic Development," *Journal of Economic Literature*, vol. XLI, p. 113–158, March 2003.
- 8 U. N. Statistics, 2023. [Online]. Available: [https://unstats.un.org/sdgs/indicators/Global%20Indicator%20Framework%20after%202023%20refinement\\_Eng.pdf](https://unstats.un.org/sdgs/indicators/Global%20Indicator%20Framework%20after%202023%20refinement_Eng.pdf). [Accessed 18 July 2023].
- 9 U. Nations, "Progress towards the Sustainable Development Goals: Towards a Rescue Plan for People and Planet," New York, 2023.
- 10 The World Bank Group, "Charting a Course Towards Universal Social Protection Resilience, Equity, and Opportunity for All," Washington DC, 2022.
- 11 S. Handa, F. Otchere and P. Sirma, "More evidence on the impact of government social protection in sub-Saharan Africa: Ghana, Malawi, and Zimbabwe," *Development Policy Review*, vol. 40, no. 3. <https://doi.org/10.1111/dpr.12576>, p. e12576, May 2022.
- 12 S. Handa, L. Natali, D. Seidenfeld, G. Tembo and B. Davis, "Can unconditional cash transfers raise long-term living standards? Evidence from Zambia," *Journal of Development Economics*, vol. 133, no. doi.org/10.1016/j.jdeveco.2018.01.008., pp. 42-65, 2018.
- 13 L. Carraro and M. S. L. Marzi, "Chapter 34: Effects of social protection on poverty and inequality," in *Handbook on Social Protection Systems*, E. Schüring and M. Loewe, Eds., 2021, p. 582–595.
- 14 C. Perera, S. Bakrania, A. Ipince, Z. Nesbitt-Ahmed, O. Obasola, D. Richardson, J. V. d. Scheur and R. Yu, "Impact of social protection on gender equality in low- and middle-income countries:

- A systematic review of reviews," *Campbell Systematic Reviews*, vol. 18, no. Doi.org/10.1002/cl2.1240, May 2022.
- 15 United Nations Development Programm, Income Inequality Trends in sub-Saharan Africa Divergence, Determinants and Consequences., A. Odusola, G. A. Cornia, H. Bhorat and P. Conceição, Eds., New York, 2017.
  - 16 M. Garcia and C. M. T. Moore, The Cash Dividend: The Rise of Cash Transfer Programs in Sub-Saharan Africa, doi: 10.1596/978-0-8213-8897-6 ed., Washington DC: The World Bank, 2012.
  - 17 Food and Agriculture Organization of the United Nations (FAO), From Evidence to Action. The Story of Cash Transfers and Impact Evaluation in Sub-Saharan Africa, SBN 978-0-19-876944-6 ed., B. David, S. Handa, N. Hypher, N. W. Rossi, P. Winters and J. Yablonski, Eds., Oxford: Food and Agriculture Organization of the United Nations; The United Nations Children's Fund; Oxford Press, 2016.
  - 18 Z. Mokomane, N. Xaba, K. Roehm, M. Hambayi, M. Mumma, G. Giordana, S. Mabhele and C. Mouala, "HIV-sensitive social protection: an assessment of east and southern Africa's social protection policies and programmes," *African Journal of AIDS Research*, vol. 22:2, no. 113-122, p. DOI: 10.2989/16085906.2023.2203131, June 2023.
  - 19 Joint United Nations Programme on HIV/AIDS (UNAIDS), "End inequalities. End AIDS. Global AIDS Strategy 2021-2026," Joint United Nations Programme on HIV/AIDS (UNAIDS), Geneva, 2021.
  - 20 ICAP at Columbia University, "Population-based HIV Impact Assessment (PHIA) Data Use Manual," New York, 2021.
  - 21 A. Wagstaff, O. O'Donnell, E. v. Doorslaer and M. Lindelow, Analyzing Health Equity Using Household Survey Data: A Guide to Techniques and Their Implementation, Washington DC: The World Bank, 2008.
  - 22 International Labour Office (ILO), "World Social Protection Report 2020-22: Social protection at the crossroads – in pursuit of a better future," Geneva, 2021.
  - 23 D. Chipanta, A. Pettifor, J. Edwards, D. Giovenco, H. M. Topazian, R. M. Bray, M. C. Millington, J. Estill, O. Keiser and J. E. Justman, "Access to Social Protection by People Living with, at Risk of, or Affected by HIV in Eswatini, Malawi, Tanzania, and Zambia: Results from Population-Based HIV Impact Assessments," *AIDS and Behavior*, no. <https://doi.org/10.1007/s10461-022-03645-1>, March 2022.
  - 24 N. Parekh and O. Bandiera, "Do social assistance programmes reach the poor? Micro-evidence from 123 countries," London, 2020.
  - 25 S. Levine, A. Socpa, N. Both, H. Salomon and F. Fomekong, "Integrating assistance to the displaced into a social protection system in Cameroon. An ideal, but in whose interests?," London, 2022.
  - 26 I. L. O. (ILO), "Income dynamics and their implications for social protection in the Occupied Palestinian Territory ILO Policy brief," Geneva, 2023.

- 27 U. N. G. Assembly, "Non-take-up of rights in the context of social protection Report of the Special Rapporteur on extreme poverty and human rights, Olivier De Schutter," 2022.
- 28 K. A. Abaya, N. Yonzanb, S. Kurdia and K. Tafere, "Revisiting Poverty Trends and the Role of Social Protection Systems in Africa during the COVID-19 Pandemic," *Journal of African Economies*, vol. 32, no. <https://doi.org/10.1093/jae/ejac041>, p. ii44–ii68, 2023.
- 29 A. J. D. Barros, F. C. Wehrmeister, L. Z. Ferreira, L. P. Vidaletti, A. R. Hosseinpoor and C. G. Victora, "Are the poorest poor being left behind? Estimating global inequalities in reproductive, maternal, newborn and child health," *BMJ Glob Health*, vol. 5, no. 1 Doi: 10.1136/bmjgh-2019-002229, p. e002229., 2020.
- 30 Joint United Nations Programme on HIV/AIDS (UNAIDS), "UNAIDS terminology guidelines," Geneva, 2015.

379

380

## 381 **Supporting information**

382 S1 Table. Variable descriptions.

383 S2 Table. Survey weighted proportions of men and women living with HIV by country (PHIA  
384 2015-2019).

385

386

387

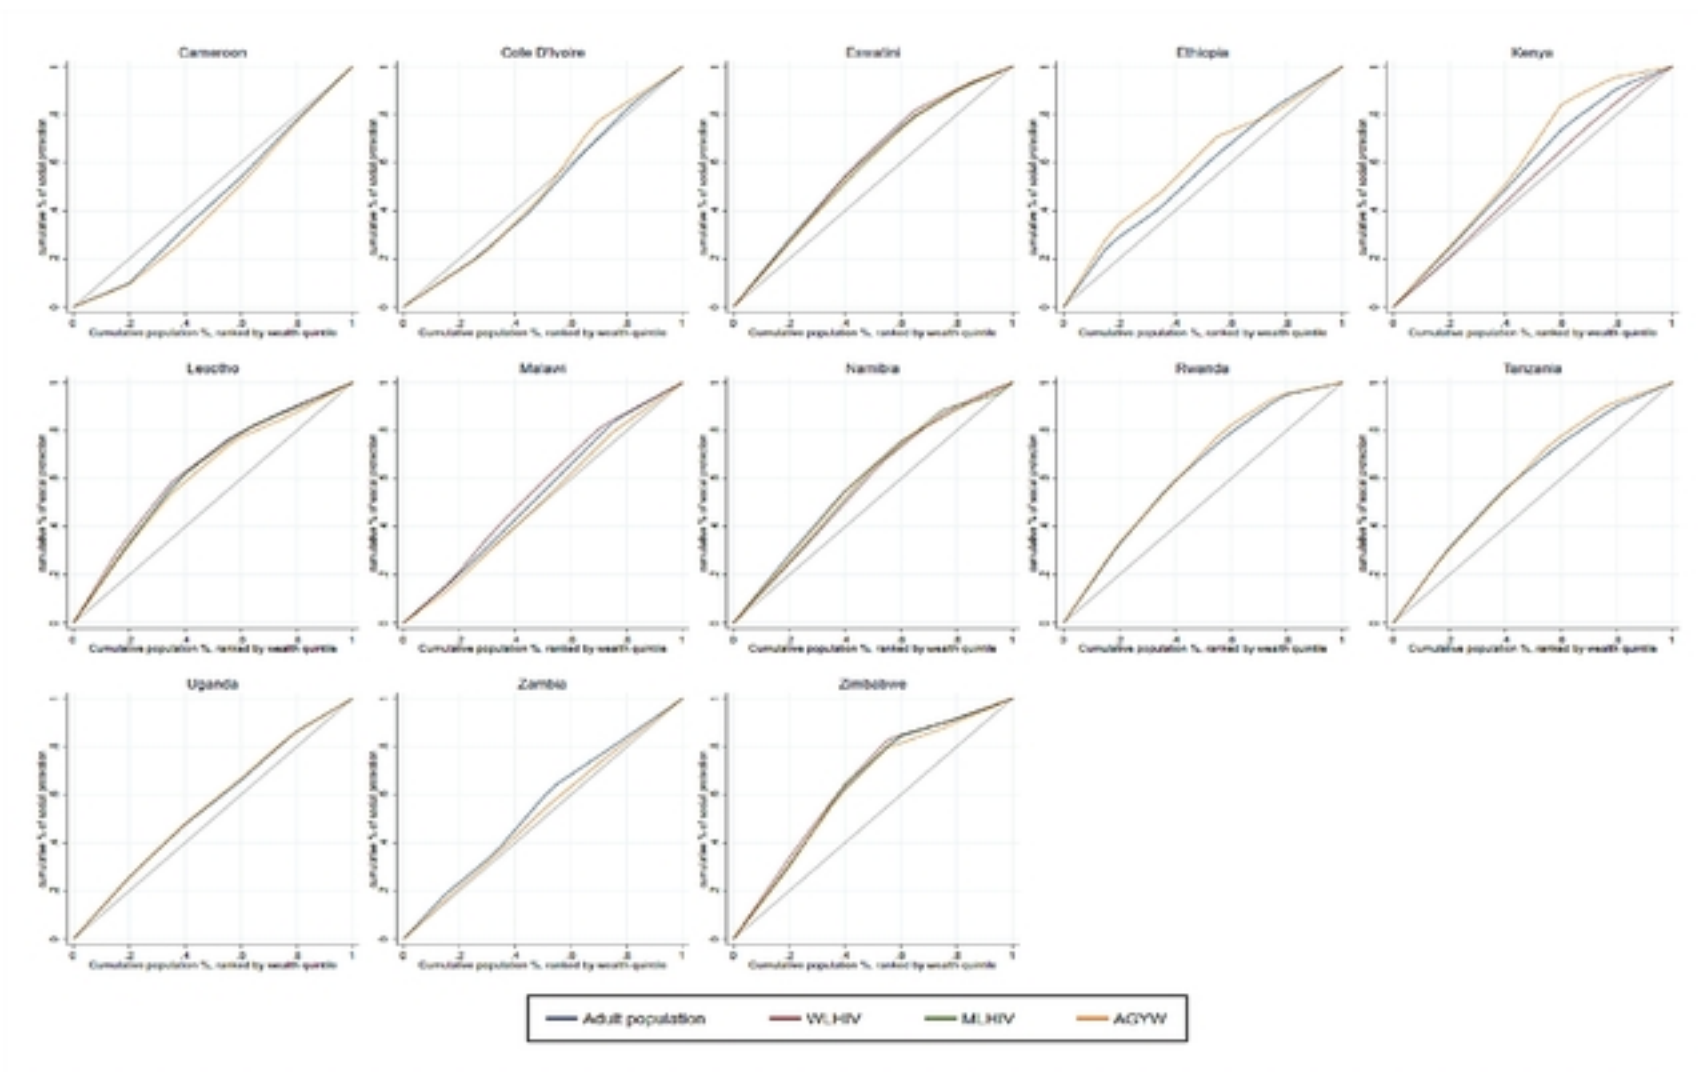

The concentration curves for the following countries and subpopulations were not shown because their observations for the wealth variables were fewer than 25: Cameroon, Côte d'Ivoire, Ethiopia, Rwanda, Tanzania, Uganda, and Zambia for MLHIV and WLHIV; Kenya and Malawi for MLHIV.
